# Supplementary material for: Phase-structure-dependent Na ion transport in yttrium-iodide sodium superionic conductor Na3YI6
Source: Royal Society of Chemistry journal article supplement (doi:10.1039/d1ta08086e), 2021-01-01
Supplement: d1ta08086e1.pdf [file d1ta08086e1.pdf]

## Supporting Information

### Phase-structure Dependent Na Ion Transport in Yttrium-Iodide

### Sodium Superionic Conductor Na<sub>3</sub>YI<sub>6</sub>

He Huang<sup>a, b</sup>, Hong-Hui Wu<sup>\*a, b</sup>, Cheng Chi<sup>c</sup>, Yuewang Yang<sup>b</sup>, Jiongzhi Zheng<sup>b</sup>, Baoling Huang<sup>\*b</sup>, and Shouguo Wang<sup>\*a</sup>

<sup>a</sup> *School of Materials Science and Engineering, University of Science and Technology Beijing, Beijing, 100083, China*

<sup>b</sup> *Department of Mechanical and Aerospace Engineering, Hong Kong University of Science and Technology, Clear Water Bay, Kowloon, Hong Kong, China*

<sup>c</sup> *Key Laboratory for Thermal Science and Power Engineering of Ministry of Education, Department of Engineering Mechanics, Tsinghua University, Beijing, 100084, China*

\* Corresponding Authors: [wuhonghui@ustb.edu.cn](mailto:wuhonghui@ustb.edu.cn) (H. H. Wu), [mebhuang@ust.hk](mailto:mebhuang@ust.hk) (B. Huang), and [sgwang@ustb.edu.cn](mailto:sgwang@ustb.edu.cn) (S. G. Wang)

**Table 1.** Structure information of the  $c2m$ - $\text{Na}_3\text{YI}_6$ ,  $p3m1$ - $\text{Na}_3\text{YI}_6$ , and  $p31c$ - $\text{Na}_3\text{YI}_6$  with corresponding atomic coordinates.

| $c2m$ - $\text{Na}_3\text{YI}_6$                                                                                                                                                                                                                                                                                                                                                                                                                                                                                                                                                      | $p3m1$ - $\text{Na}_3\text{YI}_6$                                                                                                                                                                                                                                                                                                                                                                                                                                                                                                                                                                                                                                                                                                                                                                                                                                                      | $p31c$ - $\text{Na}_3\text{YI}_6$                                                                                                                                                                                                                                                                                                                                                                                                                                                                                                                                                     |
|---------------------------------------------------------------------------------------------------------------------------------------------------------------------------------------------------------------------------------------------------------------------------------------------------------------------------------------------------------------------------------------------------------------------------------------------------------------------------------------------------------------------------------------------------------------------------------------|----------------------------------------------------------------------------------------------------------------------------------------------------------------------------------------------------------------------------------------------------------------------------------------------------------------------------------------------------------------------------------------------------------------------------------------------------------------------------------------------------------------------------------------------------------------------------------------------------------------------------------------------------------------------------------------------------------------------------------------------------------------------------------------------------------------------------------------------------------------------------------------|---------------------------------------------------------------------------------------------------------------------------------------------------------------------------------------------------------------------------------------------------------------------------------------------------------------------------------------------------------------------------------------------------------------------------------------------------------------------------------------------------------------------------------------------------------------------------------------|
| a: 8.04 Å, b: 13.62 Å, c: 8.00 Å<br>$\alpha = 90.0^\circ$ , $\beta = 109.5^\circ$ , $\gamma = 90.0^\circ$<br>Unit-cell Vol = 824.87 Å <sup>3</sup>                                                                                                                                                                                                                                                                                                                                                                                                                                    | a: 13.49 Å, b: 13.49 Å, c: 7.57 Å<br>$\alpha = 90.0^\circ$ , $\beta = 90.0^\circ$ , $\gamma = 60.0^\circ$<br>Unit-cell Vol = 1192.96 Å <sup>3</sup>                                                                                                                                                                                                                                                                                                                                                                                                                                                                                                                                                                                                                                                                                                                                    | a: 8.04 Å, b: 8.04 Å, c: 14.66 Å<br>$\alpha = 90.0^\circ$ , $\beta = 90.0^\circ$ , $\gamma = 120.0^\circ$<br>Unit-cell Vol = 821.11 Å <sup>3</sup>                                                                                                                                                                                                                                                                                                                                                                                                                                    |
| Na1 (0.000, 0.667, 0.000)<br>Na2 (0.000, 0.167, 0.000)<br>Na3 (0.000, 0.832, 0.000)<br>Na4 (0.000, 0.332, 0.000)<br>Na5 (0.500, 0.167, 0.000)<br>Na6 (0.500, 0.667, 0.500)<br>Y1 (0.000, 0.997, 0.000)<br>Y2 (0.000, 0.497, 0.500)<br>I1 (0.239, 0.155, 0.230)<br>I2 (0.761, 0.155, 0.770)<br>I3 (0.239, 0.655, 0.730)<br>I4 (0.761, 0.655, 0.270)<br>I5 (0.768, 0.839, 0.762)<br>I6 (0.232, 0.839, 0.238)<br>I7 (0.768, 0.339, 0.262)<br>I8 (0.232, 0.339, 0.738)<br>I9 (0.769, 0.001, 0.235)<br>I10 (0.231, 0.001, 0.765)<br>I11 (0.769, 0.501, 0.735)<br>I12 (0.231, 0.501, 0.265) | Na1 (0.000, 0.664, 0.000)<br>Na2 (0.000, 0.343, 0.000)<br>Na3 (0.343, 0.657, 0.000)<br>Na4 (0.664, 0.335, 0.000)<br>Na5 (0.336, 0.000, 0.000)<br>Na6 (0.657, 0.000, 0.000)<br>Na7 (0.000, 0.678, 0.500)<br>Na8 (0.678, 0.322, 0.500)<br>Na9 (0.322, 0.000, 0.500)<br>Y1 (0.000, 0.000, 0.000)<br>Y2 (0.333, 0.333, 0.503)<br>Y3 (0.667, 0.667, 0.497)<br>I1 (0.120, 0.446, 0.738)<br>I2 (0.446, 0.434, 0.738)<br>I3 (0.434, 0.120, 0.738)<br>I4 (0.554, 0.880, 0.262)<br>I5 (0.566, 0.554, 0.262)<br>I6 (0.880, 0.566, 0.262)<br>I7 (0.453, 0.774, 0.730)<br>I8 (0.774, 0.772, 0.730)<br>I9 (0.772, 0.453, 0.730)<br>I10 (0.226, 0.547, 0.270)<br>I11 (0.228, 0.226, 0.270)<br>I12 (0.547, 0.228, 0.270)<br>I13 (0.110, 0.785, 0.771)<br>I14 (0.104, 0.110, 0.771)<br>I15 (0.785, 0.104, 0.771)<br>I16 (0.215, 0.890, 0.229)<br>I17 (0.890, 0.896, 0.229)<br>I18 (0.896, 0.215, 0.229) | Na1 (0.333, 0.667, 0.471)<br>Na2 (0.333, 0.667, 0.029)<br>Na3 (0.667, 0.333, 0.529)<br>Na4 (0.000, 0.000, 0.250)<br>Na5 (0.667, 0.333, 0.971)<br>Na6 (0.000, 0.000, 0.750)<br>Y1 (0.333, 0.667, 0.750)<br>Y2 (0.667, 0.333, 0.250)<br>I1 (0.036, 0.681, 0.873)<br>I2 (0.319, 0.964, 0.627)<br>I3 (0.036, 0.355, 0.627)<br>I4 (0.319, 0.355, 0.873)<br>I5 (0.645, 0.964, 0.873)<br>I6 (0.355, 0.319, 0.373)<br>I7 (0.645, 0.681, 0.627)<br>I8 (0.355, 0.036, 0.127)<br>I9 (0.681, 0.645, 0.127)<br>I10 (0.964, 0.645, 0.373)<br>I11 (0.681, 0.036, 0.373)<br>I12 (0.964, 0.319, 0.127) |

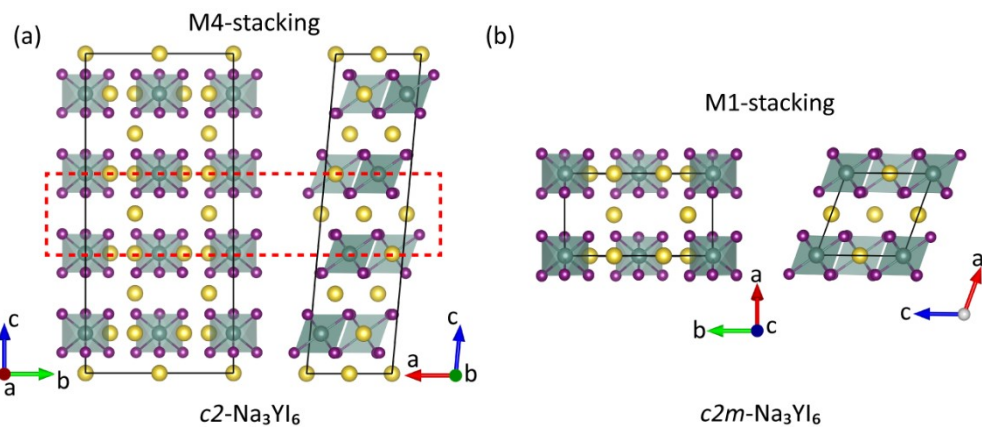

**Figure S1.** Crystal information of the  $c2\text{-Na}_3\text{YI}_6$  and the  $c2m\text{-Na}_3\text{YI}_6$ . The yellow, cyan, and purple balls represent the Na, Y and I atoms, respectively. The cyan polyhedra represent the  $\text{YI}_6$  octahedra.

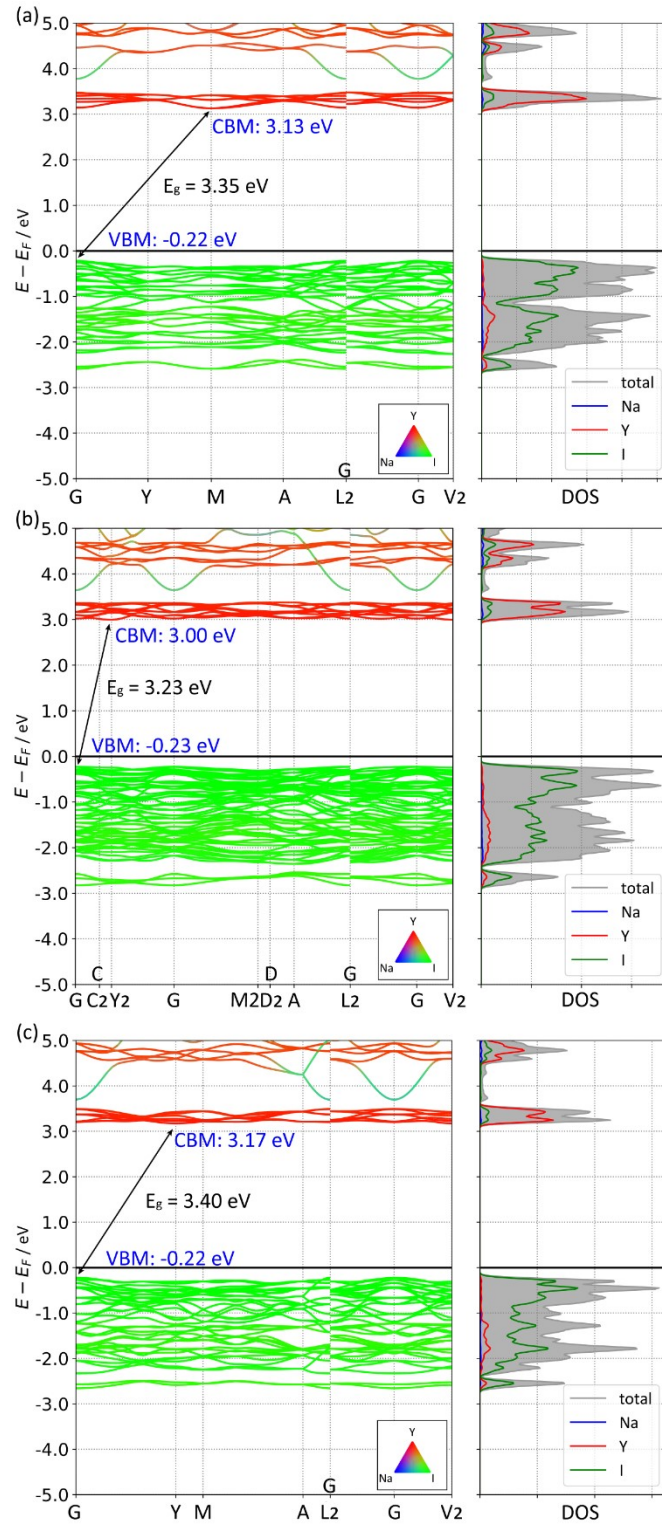

**Figure S2.** Element weighted electronic band structures of (a) c2m- $\text{Na}_3\text{YI}_6$ , (b) p3m1- $\text{Na}_3\text{YI}_6$ , and (c) p31c- $\text{Na}_3\text{YI}_6$  calculated by PBE functional.

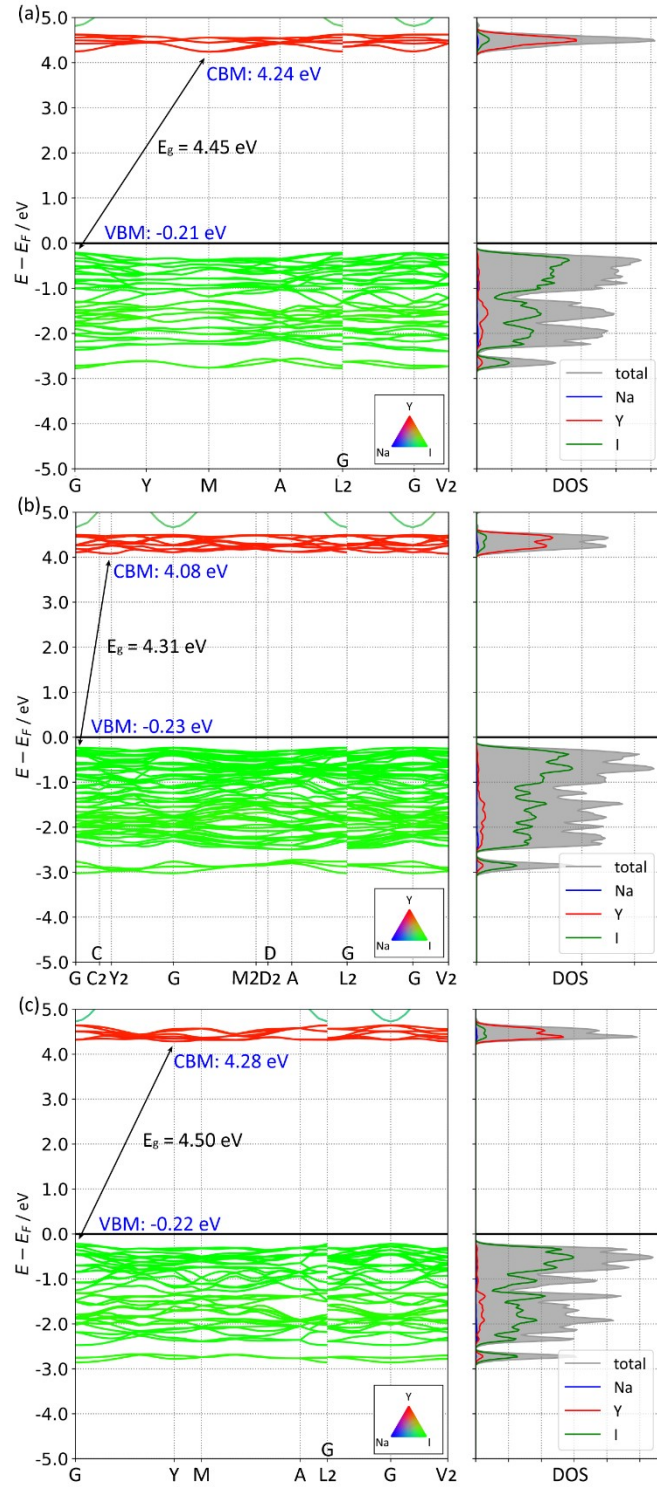

**Figure S3.** Element weighted electronic band structures of (a)  $c2m$ - $\text{Na}_3\text{YI}_6$ , (b)  $p3m1$ - $\text{Na}_3\text{YI}_6$ , and (c)  $p31c$ - $\text{Na}_3\text{YI}_6$  calculated by HSE06 functional.

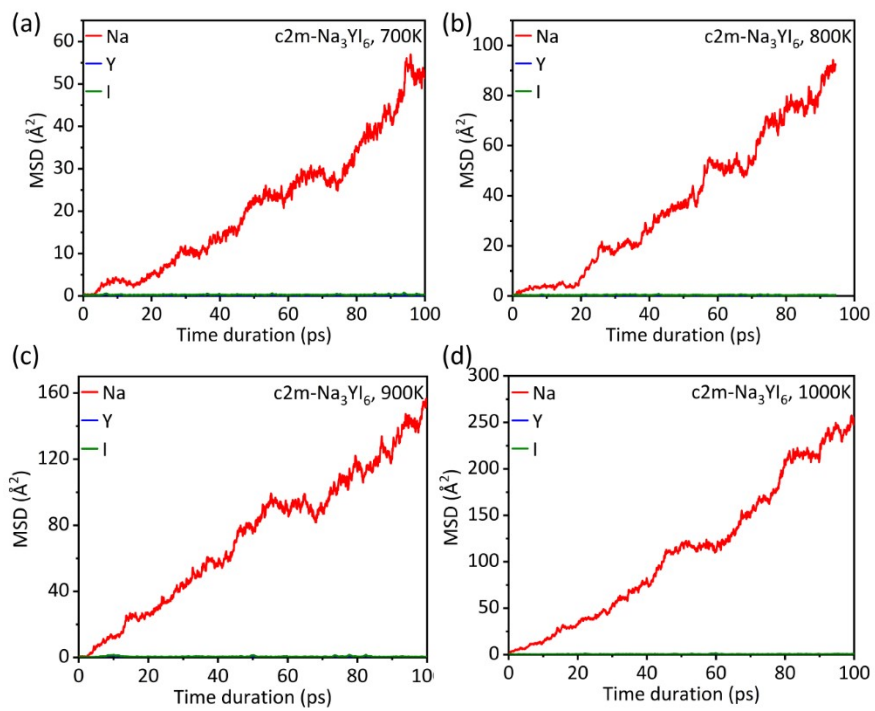

**Figure S4.** Mean square displacements of  $c2m\text{-Na}_3\text{YI}_6$  at the temperature range from 700 K to 1000 K with the time duration of 100 ps.

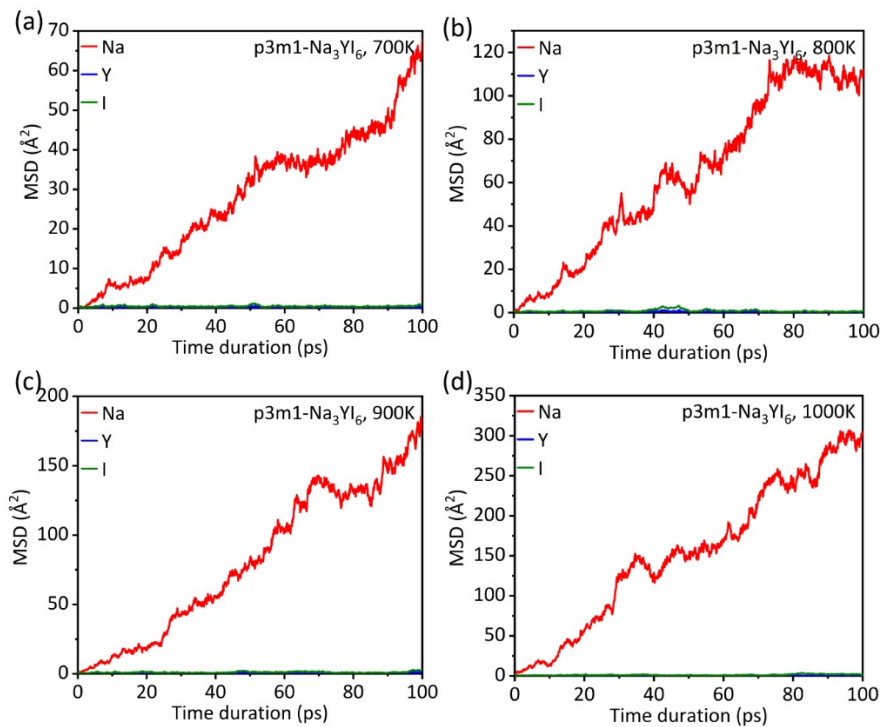

**Figure S5.** Mean square displacements of  $\text{p3m1-Na}_3\text{YI}_6$  at the temperature range from 700 K to 1000 K with the time duration of 100 ps.

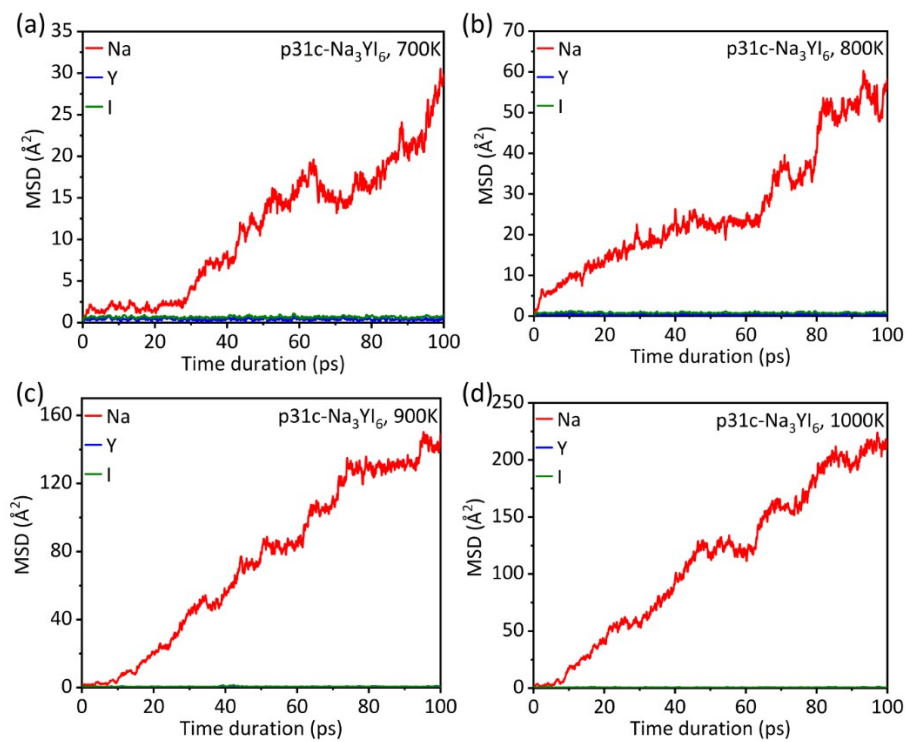

**Figure S6.** Mean square displacements of  $\text{p3m1-Na}_3\text{YI}_6$  at the temperature range from 700 K to 1000 K with the time duration of 100 ps.



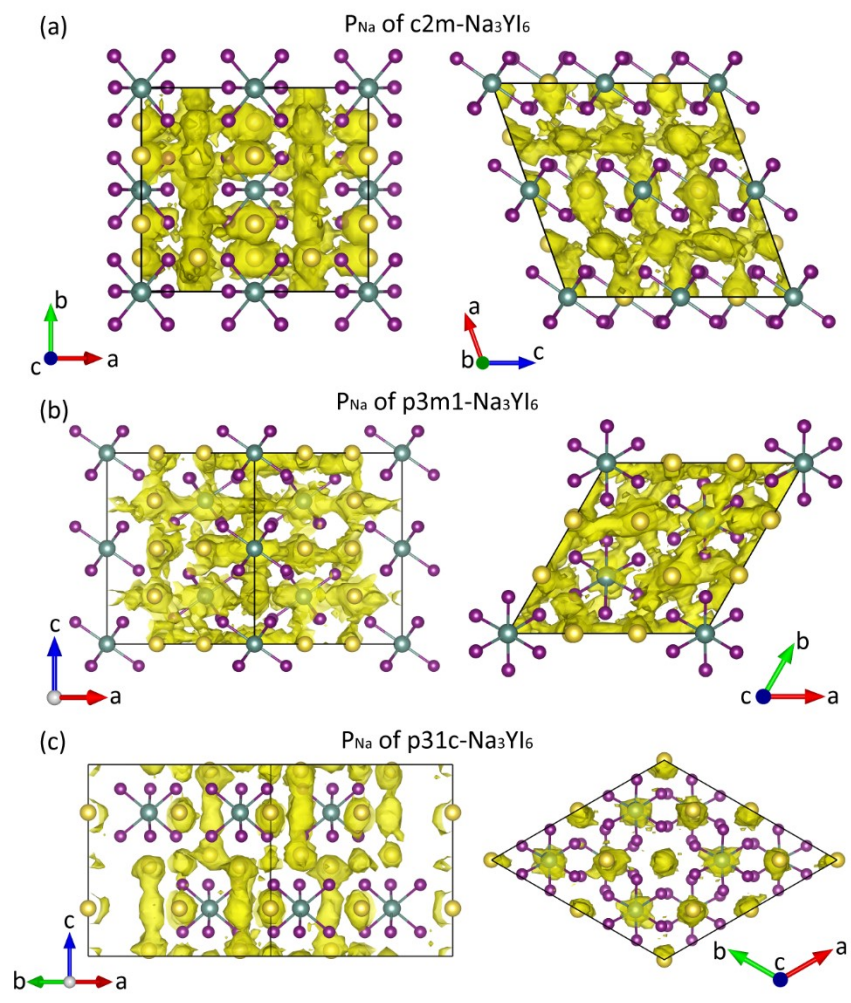

**Figure S7.** Na ion probability density distribution (yellow ribbon) in (a)  $c2m-Na_3YI_6$ , (b)  $p3m1-Na_3YI_6$ , and (c)  $p31c-Na_3YI_6$  at 900 K, with the isosurface value of  $1/32 P_{max}$ .

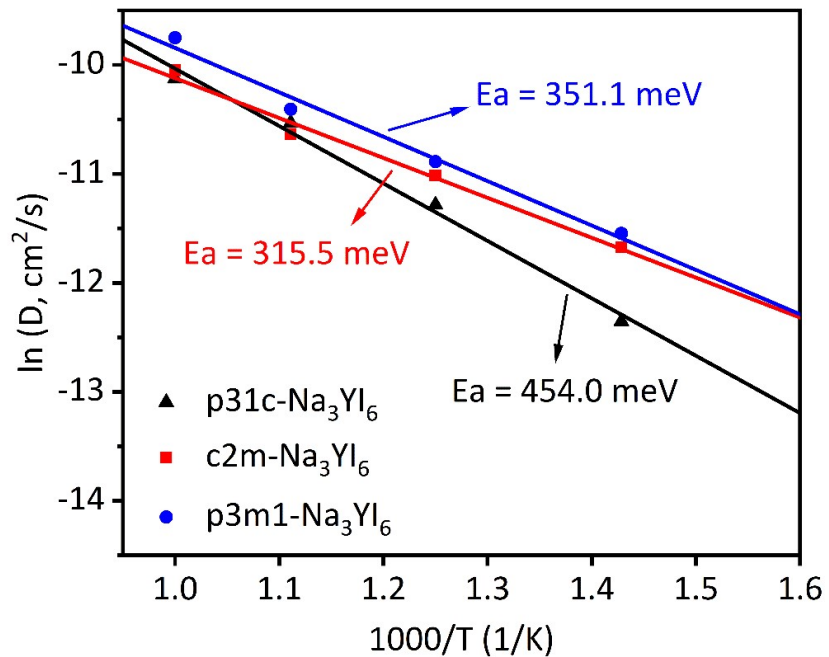

**Figure S8.** Arrhenius plot of the Na ionic diffusivities versus the inverse of the temperature of *c2m*-Na<sub>3</sub>YI<sub>6</sub>, *p3m1*-Na<sub>3</sub>YI<sub>6</sub>, and *p31c*-Na<sub>3</sub>YI<sub>6</sub> obtained from the AIMD calculations. The corresponding fitted Na activation energy values are labeled.
